# Supplementary material for: The Illusion of Competence: A Deep Dive into Workplace False Performance
Source: Preprints.org preprint supplement (doi:10.20944/preprints202409.0019.v1), 2024-09-02
Supplement: Supplementary file 1 [file supplementary]

List of Publications

___________________________________________________________________________

Dunnion, M., Gbadamosi, G., & Francis-Smythe, J. (2012, September). *The Masked Employee: A qualitative investigation of the false performer’s unethical behaviour in the workplace*. Proceedings of the British Academy of Management (BAM) 2012 Conference, University of Cardiff, Wales.

Dunnion, M., Gbadamosi, G., & Francis-Smythe, J. (2012, July). *A Tale of Two Faces: How to Detect the False Performing Employee in the Workplace*. Poster session presented at the Psychology Postgraduate Affairs Group (PsyPAG) Annual Conference, Northumbria University, Newcastle upon Tyne.

Dunnion, M., Gbadamosi, G., & Francis-Smythe, J. (2012, July). *On the Trail of the False Performer: A qualitative investigation into how to detect unethical workplace behaviour*. Paper presented at the Fifth International Society of Business Economics, and Ethics (ISBEE) World Congress 2012, Kozminski University, Warsaw, Poland.

Dunnion, M. (2012, May). *Counting the Costs of False Performance: When Employee Deception Compromises the Ethics of the Organisation*. Oral presentation at the University of Gloucester Postgraduate Conference, Gloucester.

Dunnion, M., Gbadamosi, G., & Francis-Smythe, J. (2012, April). *Detecting the ‘Jekyll and Hyde’ Employee: Management and non-management perceptions of the false performer in the workplace*. Paper presented at the British Psychological Society (BPS) Annual Conference, London.

Dunnion, M., Gbadamosi, G., & Francis-Smythe, J. (2011, September). *Detecting the ‘Jekyll and Hyde’ Employee: Management and non-management perceptions of the false performer in the workplace*. Paper presented at the 24th European Business Ethics Network Conference (EBEN), University of Antwerp, Belgium.

Dunnion, M. (2011, May). *Detecting the ‘Jekyll and Hyde’ Employee: Investigating false performance in the job interview and the workplace beyond*. Oral presentation at the University of Worcester Research Student Conference, Worcester.

Dunnion, M. (2011, May). *Detecting the ‘Jekyll and Hyde’ Employee: Investigating false performance in the job interview and the workplace beyond*. Oral presentation at the University of Gloucester Postgraduate Conference, Gloucester.

Dunnion, M. (2010, December). *Welcome to the Workplace Masquerade: detecting unethical behaviour and unmasking the false performing colleagues in our midst*. Oral presentation at CREST/GuildHE Research Symposium, London.
